# Supplementary material
Source: HighWire-hosted journal article supplement (https://gut.bmj.com/content/71/2/287)

Survival analysis was performed to study the association between various antibiotics and ADA formation

Primary exposures:  
Most commonly prescribed antibiotics

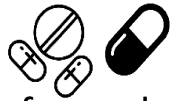

A covariate for each antibiotic class

Secondary effects (confounders):  
IBD therapy, hospitalizations,  
surgical procedures

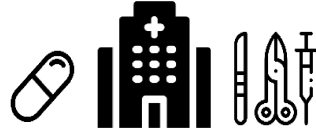

Changes in the status of  
exposures over the duration of  
follow-up were captured and  
analyzed (time varying  
covariates)

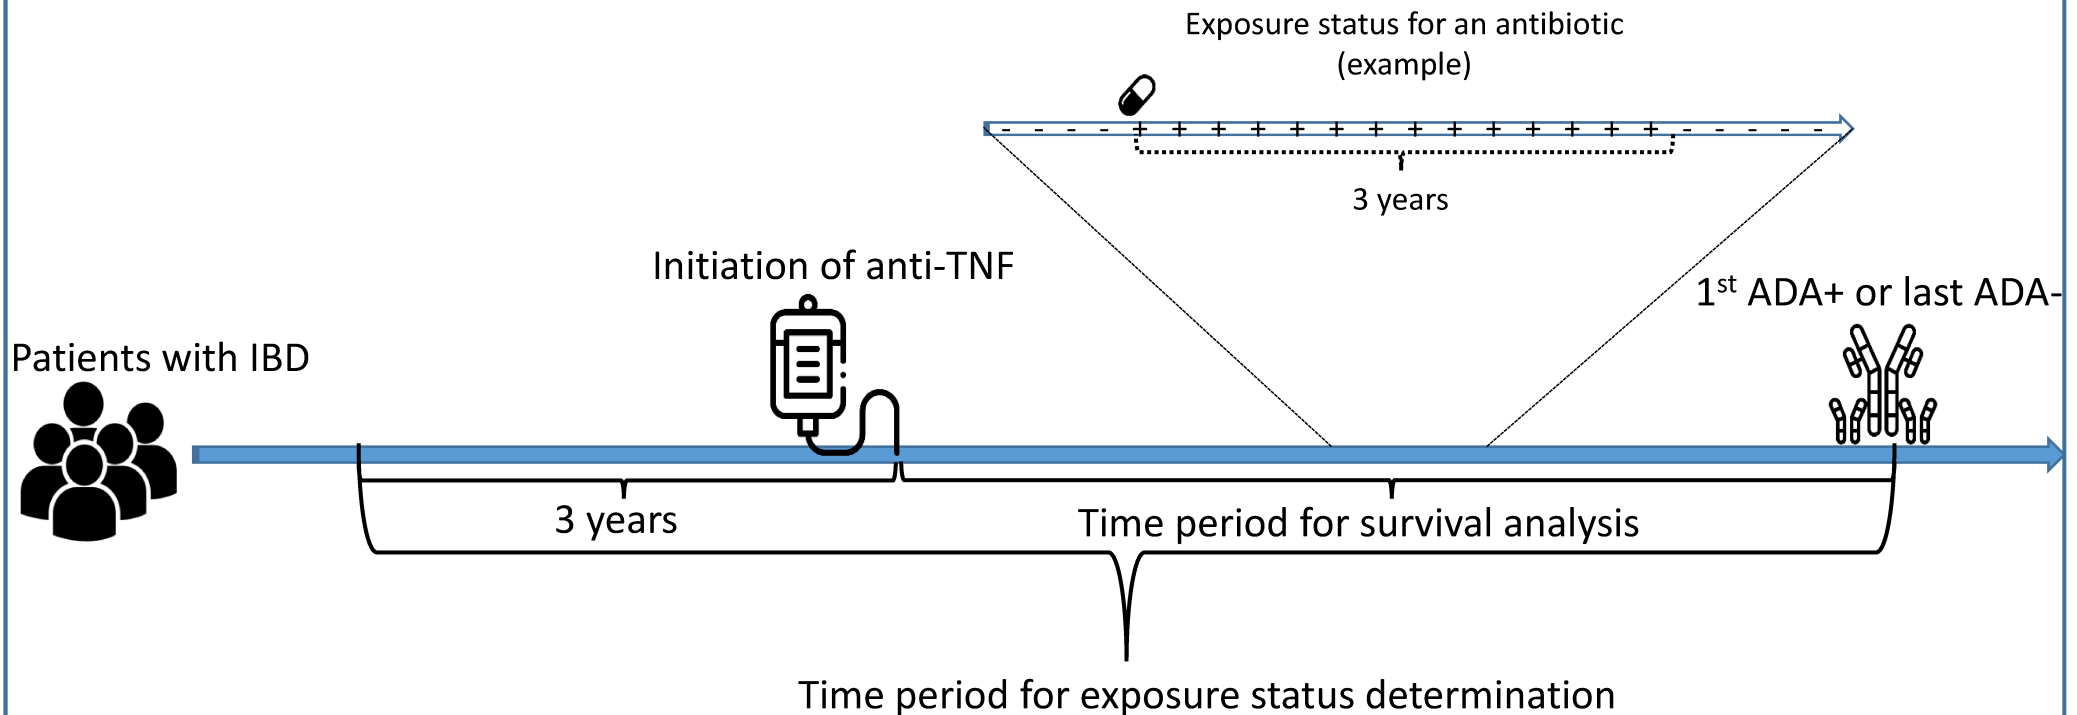

Supplement: inline-supplementary-material-2 [file inline-supplementary-material-2.pdf]
